# Supplementary material
Source: PubMed Central journal article supplement (PMC7990746)
Supplement: NIHMS1624655-supplement-1.pdf [file NIHMS1624655-supplement-1.pdf]

### Supplemental Text S1. Interview Guide

1. In addition to yourself and other family caregivers, has your loved one ever received formal caregiving in the home?
  - Probe: What type of home care worker?
  - Probe: When did your loved one have a home care worker (e.g., after a hospitalization or for long-term help)?
  - Probe: How many days a week has the home care worker cared for your loved one?
2. To the best of your knowledge, what diseases/conditions does your loved one have?
  - Probe: Cardiovascular disease? Cancer? Breathing problems? Kidney problems? Pain?
  - Probe: For which of these conditions do they receive help from a home care worker?
  - Probe: Do they have a condition called congestive heart failure?
3. Describe your experience with having a home care worker care for your loved one.
  - Probe: What are your interactions like (positive/negative/elaborate)?
  - Probe: What sort of tasks does the home care worker assist with? How do you decide who does what?
4. Tell me what you think the role of a home care worker is.
  - Probe: Was their role explained to you when they started the job?
  - Probe: What sort of medical training do you think they have received?
  - Probe: Do you get the sense that they understand your loved one's medical problems?
5. Tell me what your loved one's relationship with home care workers is like.
6. How would you describe communication between yourself and the home care worker?
  - Probe: How do you communicate with them (in person, by phone, by text message, by email, other)?
  - Probe: Do you think technology or a smartphone-based app could help improve your communication with the home care worker?
7. Describe how the home care worker and you handle worsening symptoms.
  - Probe: What happens during an emergency?
8. Does the home care worker interact with medical providers?
  - Probe: Who takes your loved one to the doctor?
  - Probe: Who takes your loved one to the hospital?
  - Probe: Who calls 911?
9. Name some challenges of having a formal caregiver help take care of your loved ones.
10. Name some ways in which a home care worker could do a better job caring for your loved one.

**Supplemental Table S1. Codes**

| <b>Code</b>                                 | <b>Explanation</b>                                                   |
|---------------------------------------------|----------------------------------------------------------------------|
| <b>LOGISTICS OF CARE</b>                    |                                                                      |
| adequacy of home care hours                 | home care enough/not enough                                          |
| asking for more hours                       | process of increasing home care hours                                |
| duration of home care                       | how long pt has been getting home care                               |
| emergency                                   | how to deal with emergencies                                         |
| HCW number                                  | number of home care workers for one patient                          |
| HCW source-agency                           | where aide comes from - agency                                       |
| HCW source-not agency                       | where aide comes from - private (hired directly, not through agency) |
| HCW turnover                                | turnover of home care workers; aide leaving                          |
| home care initiation                        | circumstances around initiation of home care                         |
| home care initiation: finding aide          | how pt/family looked for and found aide                              |
| home care initiation: medical circumstances | medical/functional reasons pt needed aide                            |
| home care initiation: pt-cg disagreement    | pt and caregiver disagree about need for aide                        |
| hours of home care                          | schedule of home care                                                |
| nurse services                              | pt receiving home nurse care                                         |
| other nonmedical services                   | other nonmedical services (housekeeper, etc.)                        |
| other services                              | other home care services pt receives (PT, SW, etc.)                  |
| payment-Medicaid                            | aide paid for by Medicaid                                            |
| payment-Medicaid: consumer-directed         | aide paid for by Medicaid consumer-directed program                  |
| payment-Medicare                            | aide paid for by Medicare                                            |
| payment-other insurance                     | aide paid for by long-term care insurance, work policy, etc.         |
| payment-out of pocket                       | aide paid for directly by pt/family                                  |
| post-acute                                  | short-term home care (this is often post-hospitalization)            |
|                                             |                                                                      |
| <b>PATIENT CHARACTERISTICS</b>              |                                                                      |
| patient agitation                           | agitation                                                            |
| patient cognition                           | cognitive conditions (e.g., dementia)                                |
| patient diseases                            | medical conditions                                                   |

|                                                |                                                                                                  |
|------------------------------------------------|--------------------------------------------------------------------------------------------------|
| patient function                               | functional status                                                                                |
| patient hospitalization                        | hospitalization in the past year                                                                 |
| patient progression                            | anticipated changes in pt situation                                                              |
| resistance to care                             | pt refuses or doesn't want home care                                                             |
|                                                |                                                                                                  |
| <b>CAREGIVER CHARACTERISTICS &amp; EFFECTS</b> |                                                                                                  |
| caregiver activities                           | caregiver's job, leisure, other activities                                                       |
| caregiver stress                               | caregiver feels stressed, anxious, overwhelmed, etc - negative effect of caregiving on caregiver |
| other family and friends                       | involvement (or not) of other family or friends in caregiving                                    |
| support for caregiver                          | help or support for caregiver from others                                                        |
|                                                |                                                                                                  |
| <b>HCW &amp; CAREGIVER TASKS</b>               |                                                                                                  |
| caregiver inexperience or difficulty           | caregiver unable to do tasks or doesn't know how                                                 |
| caregiver tasks                                | tasks done by caregiver                                                                          |
| caregiver training HCW                         | caregiver training/instructing HCW                                                               |
| HCW task planning                              | how people know/decide which tasks will be done (care plan, etc.)                                |
| HCW tasks errands                              | help with running errands or going to appointments                                               |
| HCW tasks food                                 | help with meal prep and eating                                                                   |
| HCW tasks housekeeping                         | help with housekeeping                                                                           |
| HCW tasks medical tasks                        | help with other medical things (wound care, bandages, catheterization, etc.)                     |
| HCW tasks medication                           | help with taking medication                                                                      |
| HCW tasks moving pt                            | help with physically moving around, lifting pt, etc                                              |
| HCW tasks other                                | other tasks HCW does                                                                             |
| HCW tasks personal care                        | personal care tasks (bathing, dressing, etc.)                                                    |
| HCW tasks not done                             | tasks HCW doesn't do                                                                             |
| HCW-caregiver overlap                          | overlap between HCW and caregiver - both doing same task                                         |
| HCW-caregiver planning                         | planning/discussion of care between HCW and caregiver                                            |
| medical visits                                 | taking pt to medical appointments, hospital, etc.                                                |
|                                                |                                                                                                  |

|                                                    |                                                                              |
|----------------------------------------------------|------------------------------------------------------------------------------|
| <b>HOME CARE EFFECTS &amp; HCW CHARACTERISTICS</b> |                                                                              |
| HCW characteristics - negative                     | negative traits/habits of HCW                                                |
| HCW characteristics - positive                     | positive traits/habits of HCW                                                |
| HCW cultural differences                           | experience of cultural differences/similarities w/ HCW                       |
| HCW medical understanding                          | caregiver perception of HCW understanding of medical problems                |
| HCW role                                           | caregiver perception of HCW role                                             |
| HCW training                                       | caregiver perception of HCW prior training/experience (not by caregiver)     |
| home care challenges                               | negatives about home care experience                                         |
| home care improvement                              | ways home care could be improved                                             |
| home care satisfaction                             | positives about home care experience                                         |
| language barriers                                  | difficulty in communication due to language, or specific language needs      |
| privacy                                            | effect of caregiving on privacy and attempts to mitigate                     |
| pt remains home, avoid NH                          | avoiding nursing home placement because of home care                         |
| reliability                                        | HCW reliability/dependability/trustworthiness                                |
|                                                    |                                                                              |
| <b>RELATIONSHIPS &amp; COMMUNICATION</b>           |                                                                              |
| agency role                                        | interaction with home care agency                                            |
| compromise                                         | compromises between pt, caregiver, HCW                                       |
| HCW-caregiver communication                        | mode of communication between HCW and caregiver (in person, phone, etc.)     |
| HCW-caregiver relationship                         | quality of relationship between HCW and caregiver                            |
| HCW-pt relationship                                | relationship between pt and HCW (including companionship, positive/negative) |
| pt-caregiver relationship                          | relationship between pt and caregiver                                        |

HCW = home care worker

CG, caregiver = family caregiver

Pt = patient
